# Supplementary material
Source: PubMed Central journal article supplement (PMC5627000)
Supplement: AEM.00855-17_zam999118105s1.pdf [file AEM.00855-17_zam999118105s1.pdf]

1 **Supplemental Materials For:**

2 **Removal of soluble strontium into biogenic carbonate minerals from a highly saline**  
3 **solution using halophilic bacterium, *Bacillus* sp. TK2d.**

4 Takumi Horiike<sup>1</sup>, Yuma Dotsuta<sup>1</sup>, Yuriko Nakano<sup>2</sup>, Asumi Ochiai<sup>2</sup>, Satoshi Utsunomiya<sup>2</sup>,  
5 Toshihiko Ohnuki<sup>3, 4</sup> and Mitsuo Yamashita<sup>1\*</sup>

6

7 <sup>1</sup> Rare Metal Bioresearch Center, Research Organization for Advanced Engineering,  
8 Shibaura Institute of Technology, 307 Fukasaku, Minuma-ku, Saitama-city, Saitama  
9 337-8570, Japan

10 <sup>2</sup> Department of Chemistry, Kyushu University, 744 Motooka, Nishi-ku, Fukuoka-city,  
11 Fukuoka, 819-0395, Japan

12 <sup>3</sup> Laboratory for Advanced Nuclear Energy, Institute of Innovative Research, Tokyo  
13 Institute of Technology, 2-12-1 Ookayama, Meguro-ku, Tokyo, 152-8550, Japan

14 <sup>4</sup> Advanced Science Research Center, Japan Atomic Energy Agency, 2-4 Shirakata,  
15 Tokai-mura, Naka-gun, Ibaraki 319-1195, Japan

16

17 \*Address correspondence to M. Yamashita

18 Tel: +81-3-5859-8156

19 Fax: +81-3-5859-8101

20 Email: [yamashi@sic.shibaura-it.ac.jp](mailto:yamashi@sic.shibaura-it.ac.jp)

21

22

23 Supplemental figures and table

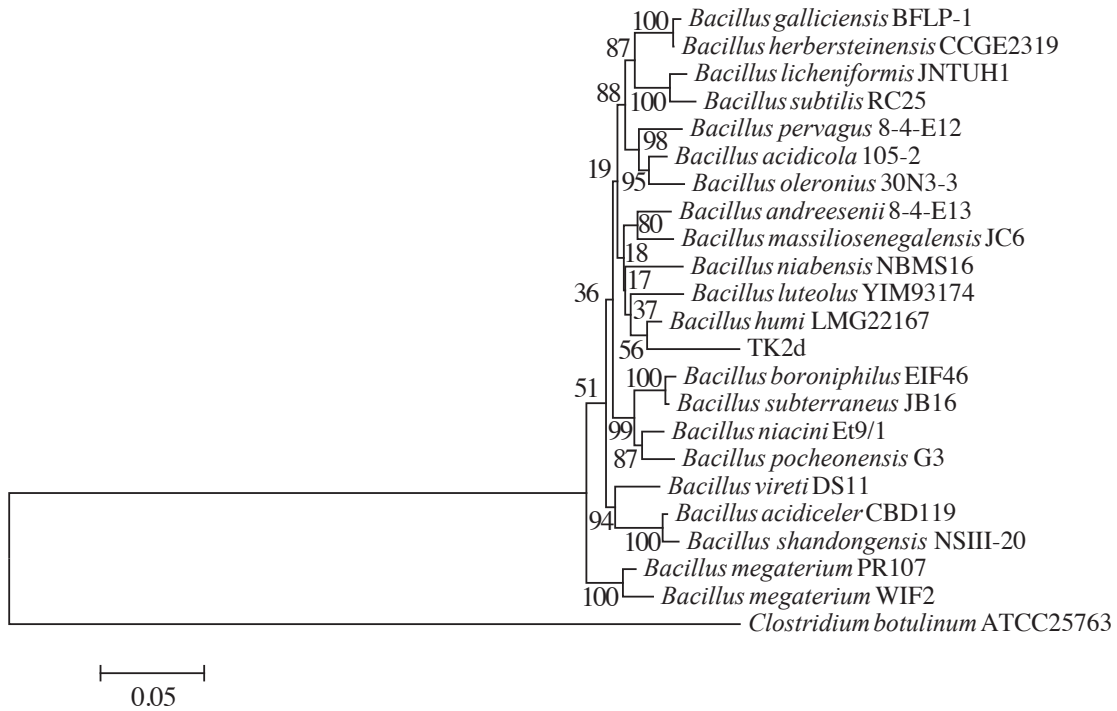

24

25 Fig. S1. Phylogenetic tree inferred from the 16S rRNA gene sequences of *Bacillaceae*.

26

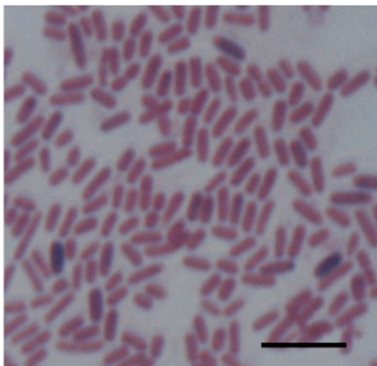

27

28 Fig. S2. Gram-stained cells of the TK2d strain. Bar = 10  $\mu$ m.

29

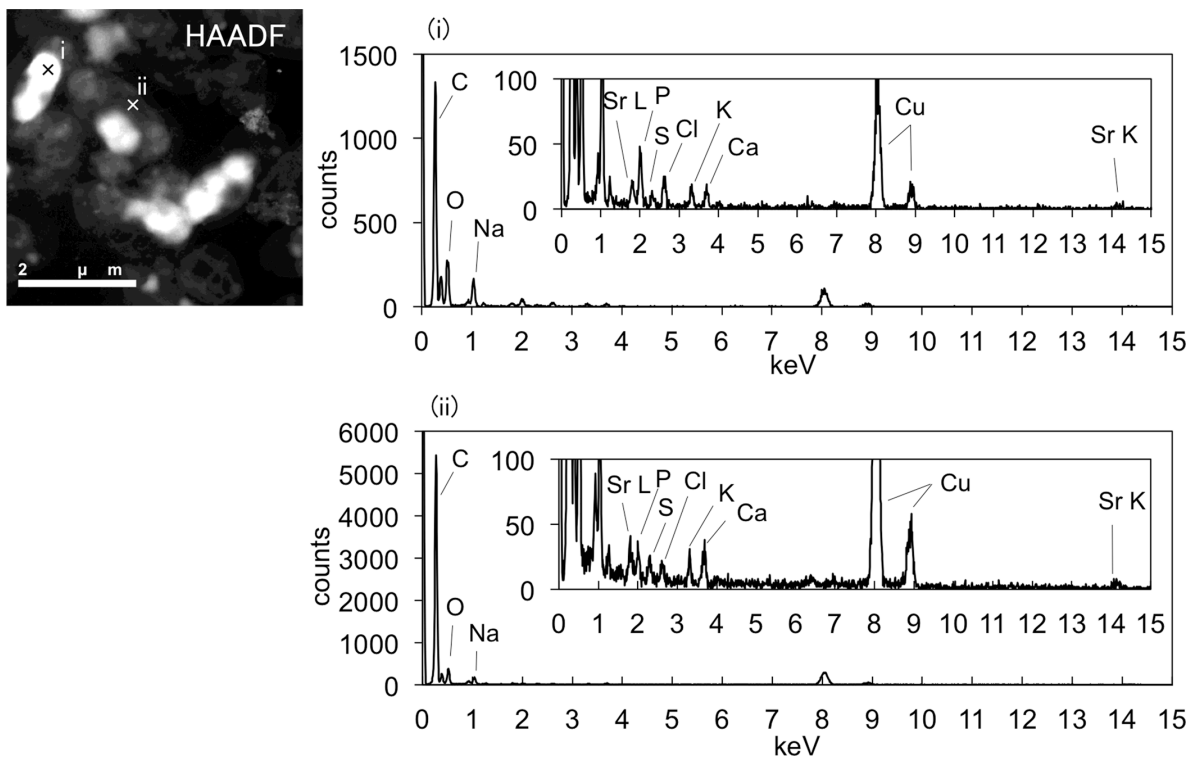

30

31 Fig. S3. HAADF-STEM image of precipitates in culture of the TK2d strain after 1.3 d (32

32 h) cultivation. HAADF-STEM image, bar = 2.0 μm. EDS spectra at spots (i) and (ii).

33

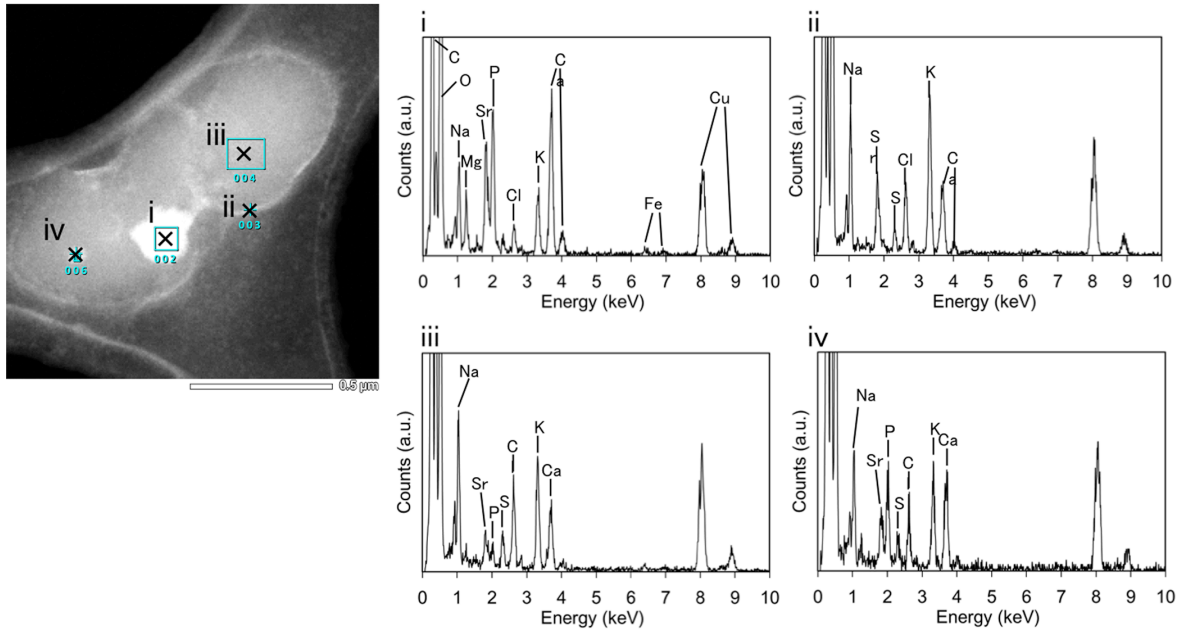

34

35 Fig. S4. HAADF-STEM image of precipitates in culture of the TK2d strain after 2 d

36 cultivation. HAADF-STEM image, bar = 0.5 μm. EDS spectra at spots i, ii, iii, and iv.

37

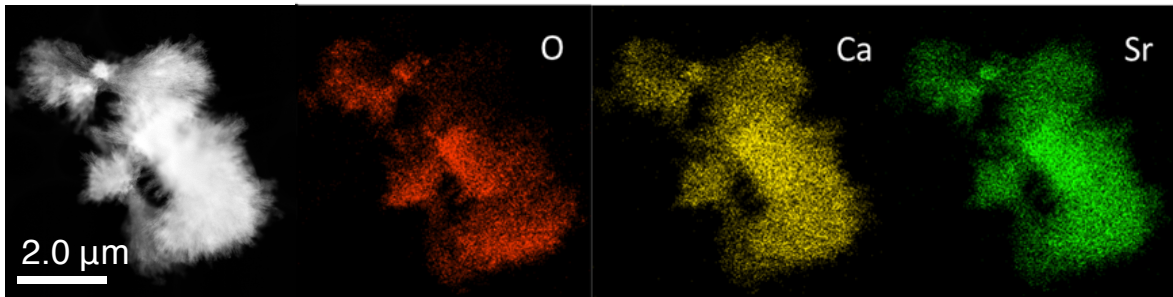

38

39 Fig. S5. HAADF-STEM images (same as Fig. 4f) and elemental mappings (O, Sr and Ca)

40 of precipitates in culture of the TK2d strain after and 8 d cultivation.

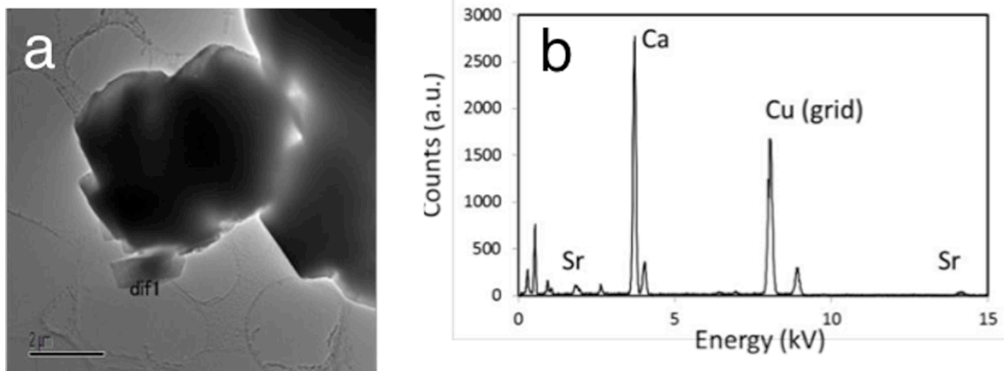

41

42 Fig. S6. BFTEM images of (a) abiotic Sr containing Ca-carbonate and (b) the associated

43 EDS spectrum. Bar = 2.0 μm.

44

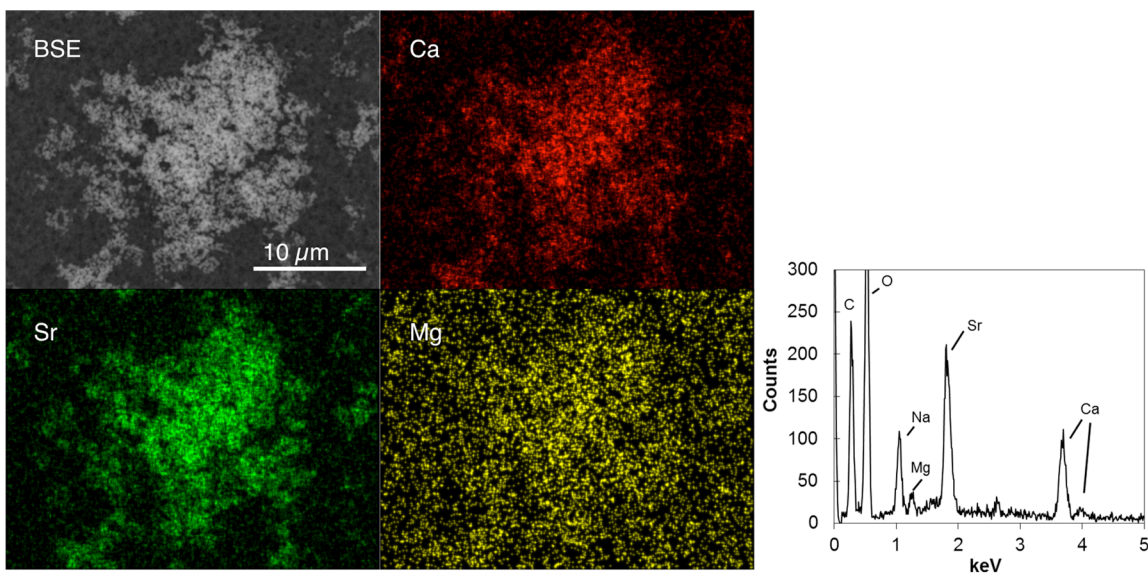

45

46 Fig. S7. SEM-EDX analysis of abiotic Sr containing Ca-carbonate from MB.

47 Back-scattered electron image (BSE), elemental mappings (Sr, Ca and Mg) and EDS

48 spectrum. Bar = 10 μm.

49

50

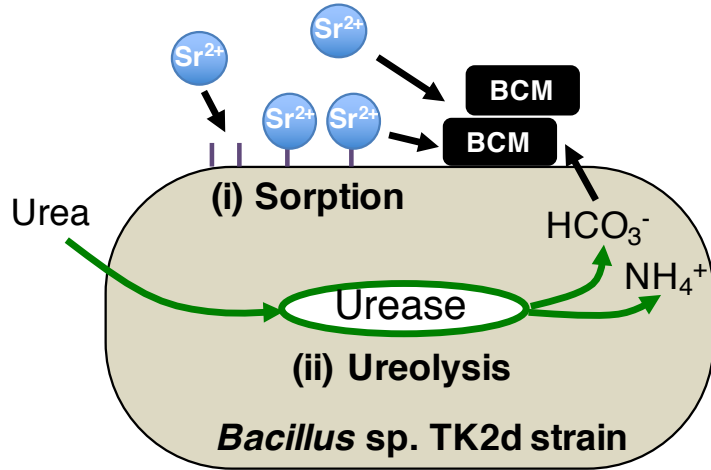

51

52 Fig. S8. The conceptual mechanism of Sr removal by the TK2d strain.

53

54 Table S1. Key characteristics that differentiate the TK2d strain from strains of closely  
 55 related bacterial species<sup>1-3</sup>.

| Characteristics       | Strain TK2d     | <i>B. humi</i><br>strain DSM16317 | <i>B. luteolus</i><br>strain YIM 93174 | <i>B. andreesenii</i><br>strain DSM23947 |
|-----------------------|-----------------|-----------------------------------|----------------------------------------|------------------------------------------|
| Cell shape            | rod             | rod                               | rod                                    | rod                                      |
| Cell size (µm)        | 0.9–1.0×1.5–2.5 | 0.7–0.9×4.0–7.0                   | 0.7–0.9×2.0–5.0                        | 0.5–0.9×1.5–3.6                          |
| Spore                 | +               | +                                 | +                                      | +                                        |
| Spore shape           | Ellipsoidal     | Ellipsoidal                       | Spherical                              | Ellipsoidal                              |
| Spore position        | (Sub) Terminal  | (Sub) Terminal                    | Terminal                               | Terminal                                 |
| Gram stain            | +               | +                                 | +                                      | +                                        |
| Motility              | +               | +                                 | +                                      | +                                        |
| Catalase              | +               | +                                 | +                                      | +                                        |
| Oxidase               | +               | +                                 | -                                      | -                                        |
| Nitrate reduction     | -               | +                                 | -                                      | +                                        |
| Anaerobic growth      | +w              | -                                 | -                                      | -                                        |
| Growth in:            |                 |                                   |                                        |                                          |
| 0% (w/v) NaCl         | +               | ND                                | +                                      | -                                        |
| 3% (w/v) NaCl         | +               | +                                 | +                                      | +                                        |
| 5% (w/v) NaCl         | +               | +                                 | +                                      | +                                        |
| 10% (w/v) NaCl        | +               | -                                 | +                                      | +                                        |
| Growth at:            |                 |                                   |                                        |                                          |
| 30 °C                 | +               | +                                 | +                                      | +                                        |
| 37 °C                 | +               | ND                                | +                                      | +                                        |
| 45 °C                 | -               | -                                 | +                                      | +                                        |
| Hydrolysis of:        |                 |                                   |                                        |                                          |
| Aesculin              | -               | +                                 | -                                      | +w                                       |
| Gelatin               | -               | -                                 | -                                      | -                                        |
| Tween 80              | +               | ND                                | -                                      | -                                        |
| Urea                  | +               | -                                 | +                                      | -                                        |
| Growth on:            |                 |                                   |                                        |                                          |
| D-Galactose           | -               | -                                 | -                                      | +                                        |
| Cellobiose            | -               | -                                 | -                                      | +                                        |
| D-Mannose             | -               | -                                 | -                                      | -                                        |
| Sucrose               | +               | -                                 | +                                      | -                                        |
| Maltose               | +               | -                                 | -                                      | +                                        |
| Acid production from: |                 |                                   |                                        |                                          |
| Lactose               | +               | +w                                | ND                                     | -                                        |
| D-Mannitol            | +               | -                                 | -                                      | -                                        |
| D-Xylose              | +               | -                                 | +                                      | -                                        |
| Trehalose             | +               | -                                 | -                                      | +                                        |
| L-Arabinose           | +               | -                                 | -                                      | -                                        |
| Glycerol              | -               | -                                 | +w                                     | +                                        |

+: positive, +w: weakly positive, -: negative, ND: no data available

56

57

58 **References in supplemental materials**

- 59 (1) Heyrman J, Rodríguez-Díaz M, Devos J, Felske A, Logan NA, De Vos P. 2005.  
60 *Bacillus arenosi* sp. nov., *Bacillus arvi* sp. nov. and *Bacillus humi* sp. nov., isolated  
61 from soil. Int J Syst Evol Microbiol 55:111–117.
- 62 (2) Shi R, Yin M, Tang SK, Lee JC, Park DJ, Zhang YJ, Kim CJ, Li WJ. 2011. *Bacillus*  
63 *luteolus* sp. nov., a halotolerant bacterium isolated from a salt field. Int J Syst Evol  
64 Microbiol 61:1344–1349.
- 65 (3) Kosowski K, Schmidt M, Pukall R, Hause G, Kämpfer P, Lechner U. 2014. *Bacillus*  
66 *pervagus* sp. nov. and *Bacillus andreesenii* sp. nov., isolated from a composting  
67 reactor. Int J Syst Evol Microbiol 64:88–94.

68
